# Supplementary material for: Targeting of the Fun30 nucleosome remodeller by the Dpb11 scaffold facilitates cell cycle-regulated DNA end resection
Source: eLife journal article supplement (doi:10.7554/elife.21687), 2017-01-07
Supplement: supp [file elife-21687-supp-v1.zip]

<sup>AD</sup>SMARCAD1 1-220

WT Ø WT T24A S34A T54A T71A S103A

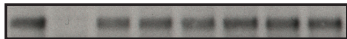

<sup>AD</sup>SMARCAD1 1-220

anti GAL4-AD

<sup>BD</sup>TOPBP1 1-360

Ø

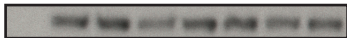

<sup>BD</sup>TOPBP1 1-360

anti-lexA-BD
