# Supplementary figures and images for: Targeting of the Fun30 nucleosome remodeller by the Dpb11 scaffold facilitates cell cycle-regulated DNA end resection
Source: eLife journal article supplement (doi:10.7554/elife.21687), 2017-01-07

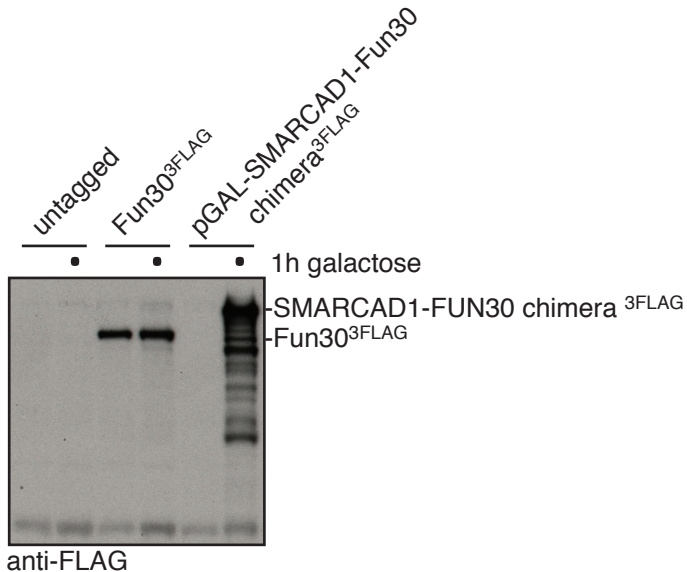

Supplement: supp [file elife-21687-supp-v1.zip]

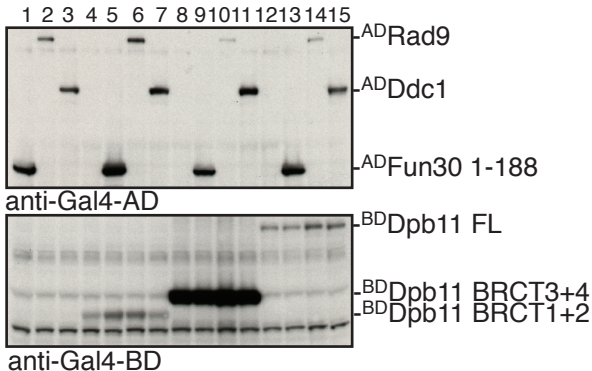

Supplement: supp [file elife-21687-supp-v1.zip]

### ***DDC1-FUN30 fusion***

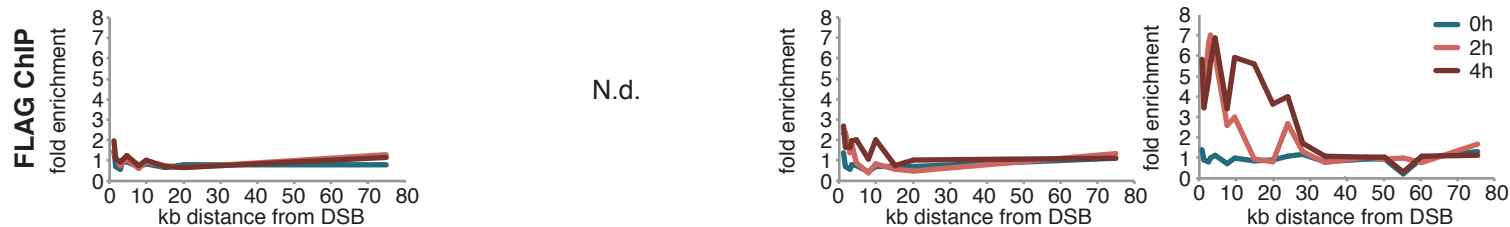

N.d.

— 0h  
— 2h  
— 4h

**G1**

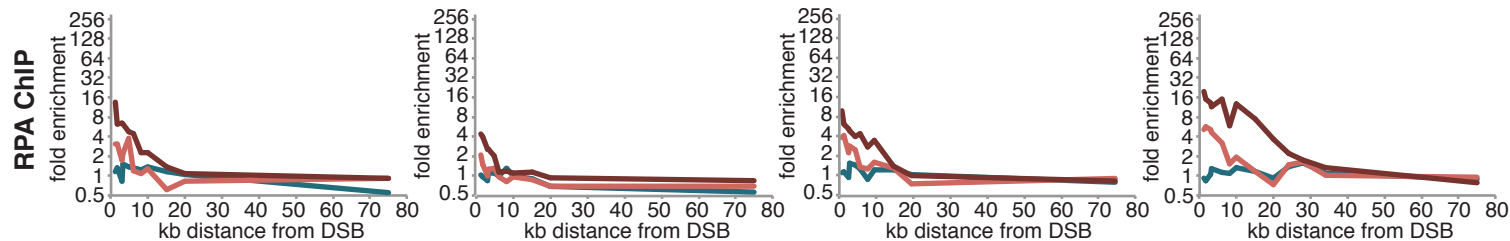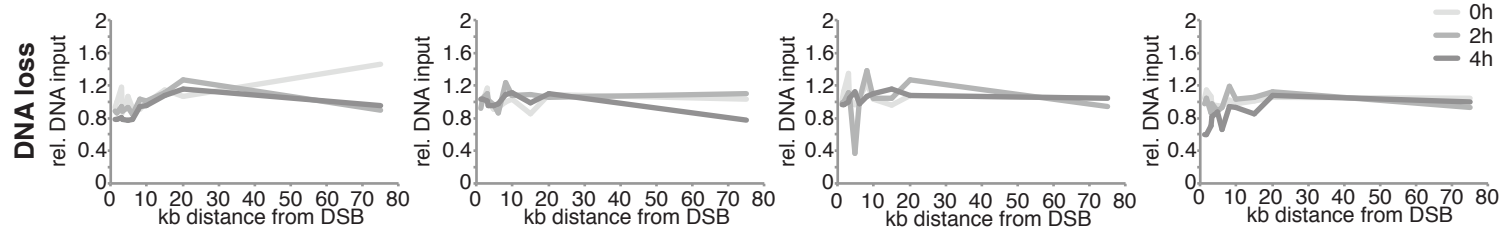

N.d.

— 0h  
— 2h  
— 4h

## M

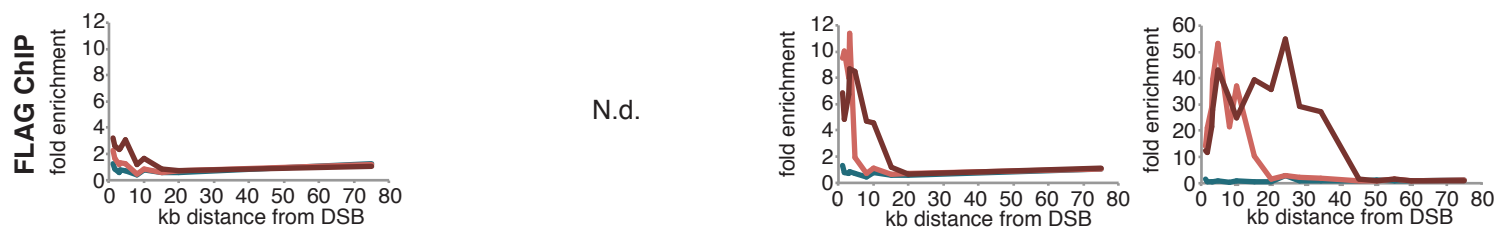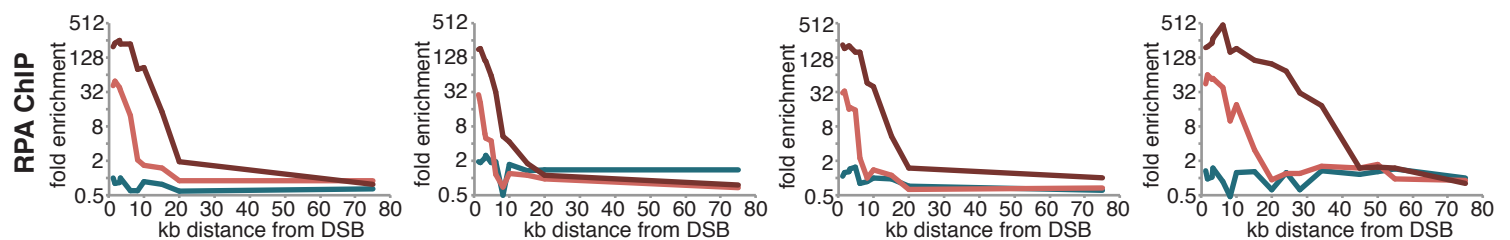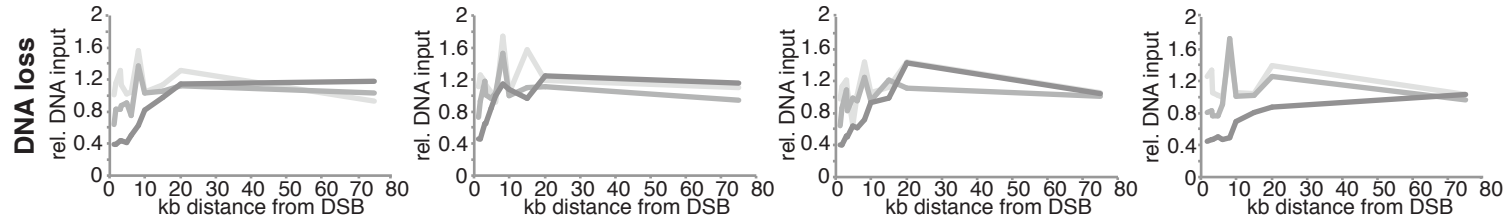

Supplement: supp [file elife-21687-supp-v1.zip]

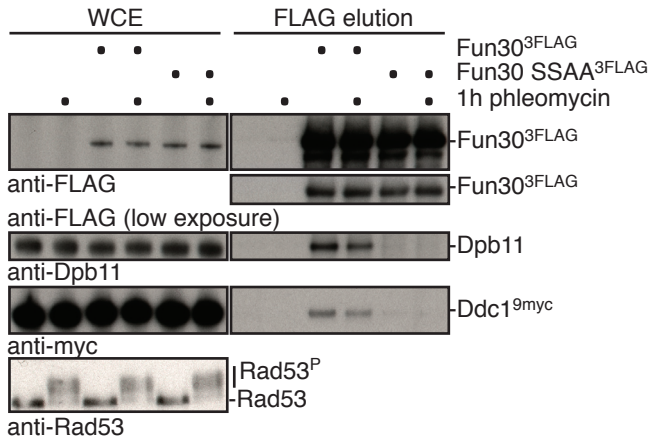

Supplement: supp [file elife-21687-supp-v1.zip]

**Fun30<sup>3FLAG</sup> ChIP in M phase**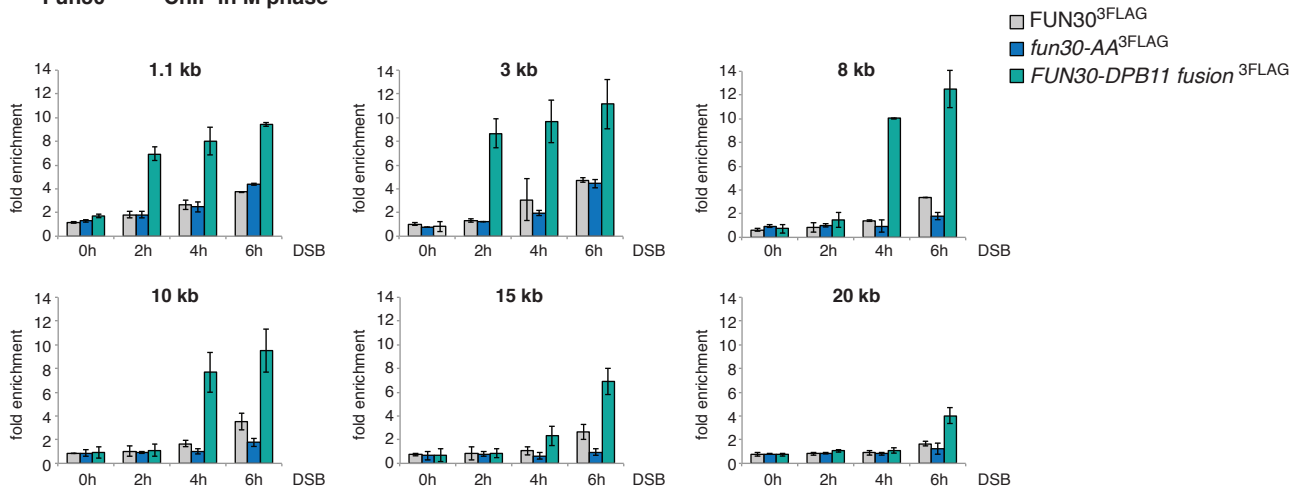

Supplement: supp [file elife-21687-supp-v1.zip]

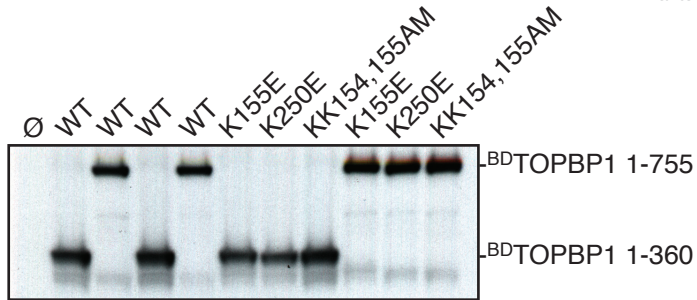

anti-LexA-BD

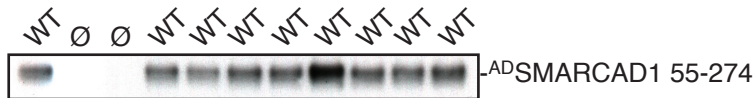

anti-Gal4-AD

Supplement: supp [file elife-21687-supp-v1.zip]

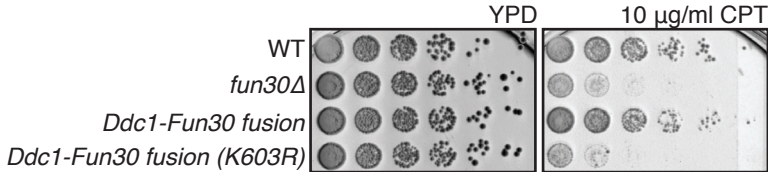

Supplement: supp [file elife-21687-supp-v1.zip]

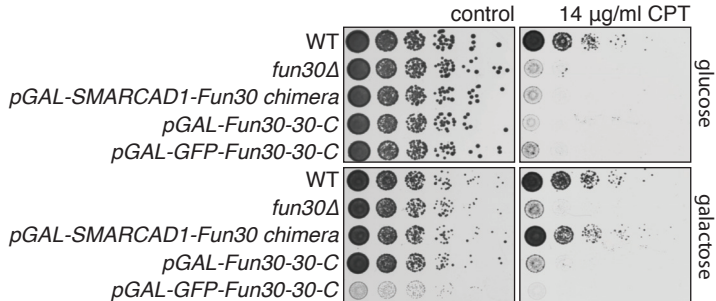

Supplement: supp [file elife-21687-supp-v1.zip]

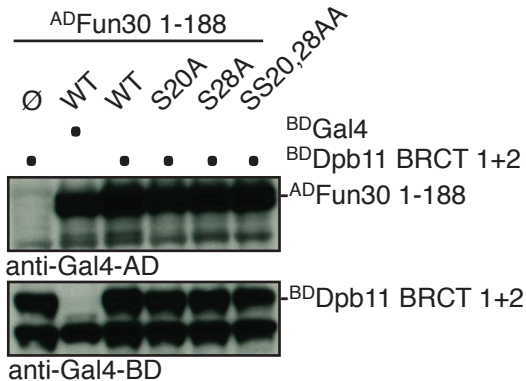

Supplement: supp [file elife-21687-supp-v1.zip]

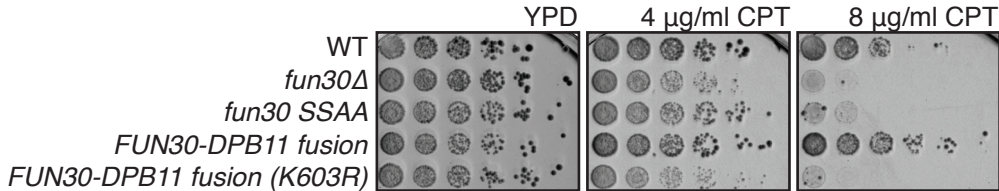

Supplement: supp [file elife-21687-supp-v1.zip]

SMARCAD1 55-274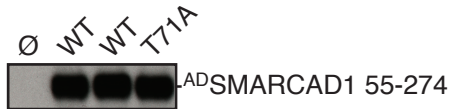

anti-GAL4-AD

• Ø • • BD Dpb11 1-276

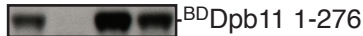

anti-GAL4-BD

Supplement: supp [file elife-21687-supp-v1.zip]

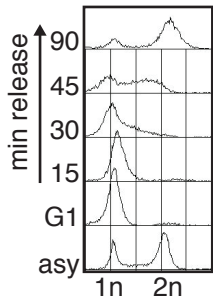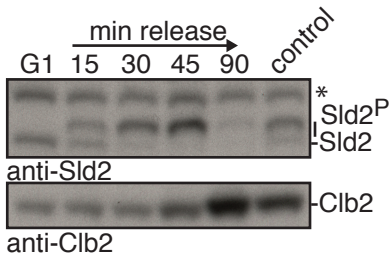

Supplement: supp [file elife-21687-supp-v1.zip]

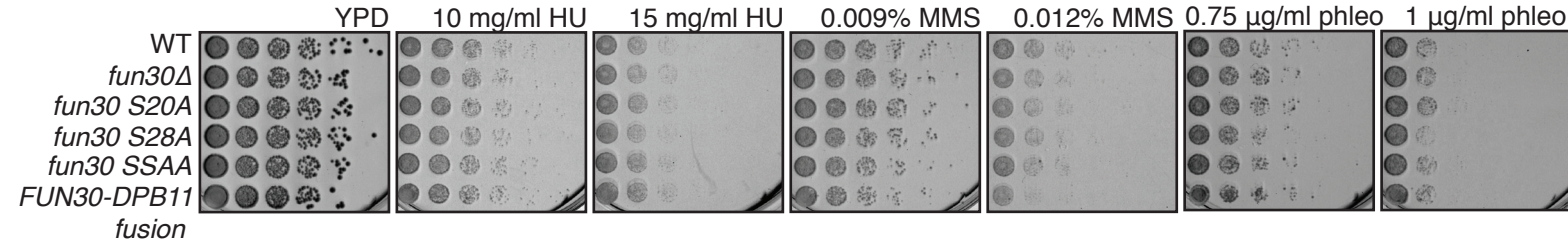

Supplement: supp [file elife-21687-supp-v1.zip]

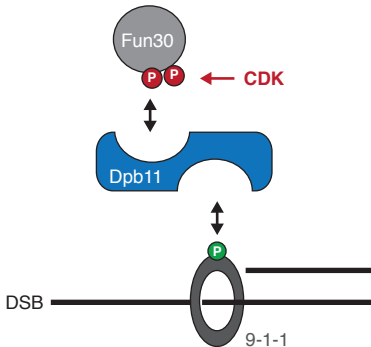

Supplement: supp [file elife-21687-supp-v1.zip]

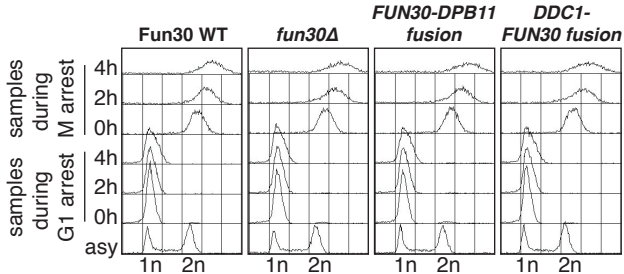

Supplement: supp [file elife-21687-supp-v1.zip]

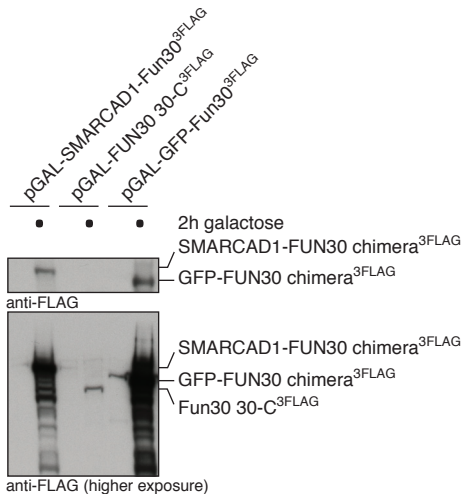

Supplement: supp [file elife-21687-supp-v1.zip]

## RPA ChIP in M phase

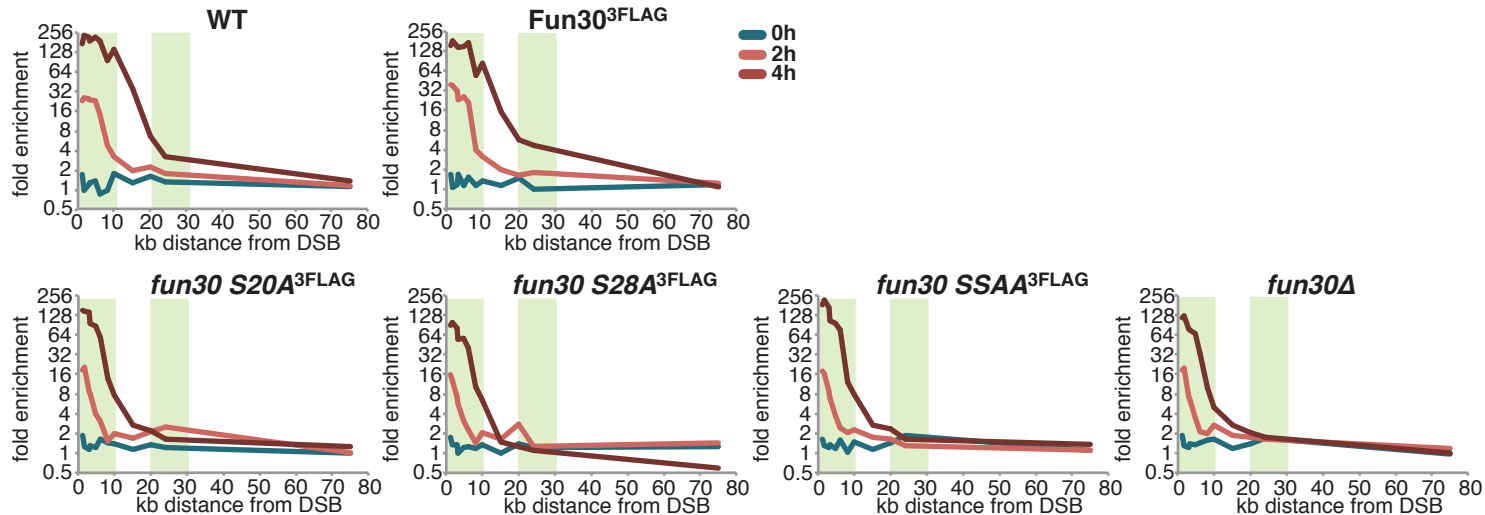

Supplement: supp [file elife-21687-supp-v1.zip]
